# Supplementary material for: Robust Resource Targeting in Continuous and Batch Process
Source: Research Square preprint supplement (doi:10.21203/rs.3.rs-336738/v1), 2021-03-22
Supplement: Supplementary file 1 [file edfa5ebcde618c18130fbfa0.docx]

**Graphical Abstract**

**Source**

**Unkown Disturbance**

**Source**

**Continous**

**Process**

**Symmetric and bounded uncertainty set**

**Robust Optimization**

**Sink**

**Sink**

**Resource**

**Batch**

**Process**
